# Supplementary material
Source: PubMed Central journal article supplement (PMC4836947)
Supplement: NIHMS774765-supplement-Table_S1.pdf [file NIHMS774765-supplement-Table_S1.pdf]

| Primer                                                                                                         | Sequence (5' to 3')                                                                                                                                                    | Application                                                         |
|----------------------------------------------------------------------------------------------------------------|------------------------------------------------------------------------------------------------------------------------------------------------------------------------|---------------------------------------------------------------------|
| HPr_F1<br>HPr_R2                                                                                               | GTCGGTTGTGGACTTGGTTGTTCTG<br>GCTTTCTCCAGTCATCCAAGTCGTTTG                                                                                                               | SOE PCR for HPr point mutations                                     |
| HPrS46D_F mid<br>HPrS46D_R mid                                                                                 | CACCCATAATGTCTTTAAGGTTAACTGATTTACCTTTGTACTCAAGAGTG<br>CCTTAAAGACATTATGGGTGTTATGAGTCTTGGTGTGG                                                                           | SOE PCR for HPr S46D mutation                                       |
| HPrS46A_F mid<br>HPrS46A_R mid                                                                                 | CACCCATAATAGCTTTAAGGTTAACTGATTTACCTTTGTACTCAAGAGTG<br>CCTTAAAGCTATTATGGGTGTTATGAGTCTTGGTGTGG                                                                           | SOE PCR for HPr S46A mutation                                       |
| HPrH15A_F mid<br>HPrH15A_R mid                                                                                 | GCTGGACGTGCCGCAATACCTGTTTCTGCCACTACG<br>CAGGTATTGCGGCACGTCCAGCAACATTGT                                                                                                 | SOE PCR for HPr H15A mutation                                       |
| HPr_LFseq<br>HPr_L2Fseq<br>HPr_L3Fseq<br>HPr_RRseq<br>HPr_R2Rseq<br>HPr_R3Rseq                                 | AGGCAACAGCACCATCGT<br>CTGAGTTGCAGGGACTTTTCG<br>TCTGCCGCTTGTTTCATCTGT<br>GTGTTTGGATAACAGGAGCTGC<br>AGAGTAAGGGCTGAAGAGGT<br>AGCAAGGCGATTTTGGTGGT                         | HPr point mutation strains sequence verification                    |
| SmaI-<br>HPr5'_F<br>XhoI-<br>HPr3'_R                                                                           | GTGCAGCCCGGGCAGAAAATGCTTGAAAAAATCCTAGAAG<br>AAAAAACTCGAGCCCTTATGCCAATCCTTCTTTTTTC                                                                                      | Cloning <i>ptsH</i> and promoter into pG <sup>+</sup> 9host         |
| HPr_F0<br>HPr_R0                                                                                               | CCTTCCCCAACTTTTCGTACCA<br>CATGTGGTGTACGGATGTCTGC                                                                                                                       | HPr point mutation strains sequence verification                    |
| ptsI_F<br>ptsI_Rmid<br>ptsI_Fmid<br>ptsI_R                                                                     | GGCATTGAAGAAGACACGGT<br>GGGATCCACTAGTTCTAGAGCGTTCCTTATGCCAATCCTTCTTTTTCCATTG<br>TAAATAACAGATTAATAAATAATAATAATCGAAAAGTCCCTGCAACTC<br>CCAACTCGCTAGCTGATAACT              | SOE PCR for <i>ptsI::spec</i>                                       |
| Spec5'_R0<br>Spec3'_F0                                                                                         | CCACGGTACCATTTCTTGCTGAATAA<br>GATGTGAGAAGAGCCATTATGGATTCCG                                                                                                             | <i>spec<sup>R</sup></i> strains sequence verification               |
| Cheshire_F<br><br>Cheshire_R                                                                                   | GGGACGCGTTGGCTTAC<br><br>GGGGCCATGGTCGATACC                                                                                                                            | CHESHIRE cassette cloning and resolved strain sequence verification |
| SP0058_F1<br>SP0058_R1sp ec<br>SP0058_F2sp ec<br>SP0058_R2                                                     | CTCTTCCTTGTATTCAGCGCTTG<br>TAAATAACAGATTAATAAATAATAATAAGAAGAAAACCTGAGCTAATCGCTTG<br>GGATCCACTAGTTCTAGAGCGCATATTTTTACCTCTATTTTCCTTCTTCCA<br>CGGTGAGCGAAGAAGGTAGT        | SOE PCR for <i>SP_0058::spec</i>                                    |
| SP0058_F0<br>SP0058_R0<br>SP0058_LFseq<br>SP0058_L2Fs eq<br>SP0058_L3Fs eq<br>SP0058_R3R seq<br>SP0058_R2R seq | TGCGTCAAGGGCCTCAAGAC<br>GAAGACTGGAAGGGCACGAGA<br>AGCTGGGATGAGACCGATG<br>TCCCCAACCACCAGTCCACA<br>CACGTTCTTTCTGCCTCTG<br>GATAAATGGAGACGGACGCAC<br>GCATCCAACCTCCATACTCTCT | <i>SP_0058::spec</i> strain sequence verification                   |

|                                                                                                            |                                                                                                                                                                                                                                                                           |                                                                                                               |
|------------------------------------------------------------------------------------------------------------|---------------------------------------------------------------------------------------------------------------------------------------------------------------------------------------------------------------------------------------------------------------------------|---------------------------------------------------------------------------------------------------------------|
| SP0058_Rseq                                                                                                | TGGCTACTTGTCCGTGGA                                                                                                                                                                                                                                                        |                                                                                                               |
| lacR2_F1<br>lacR2_R1spec<br>lacR2_F2spec<br>lacR2_R2                                                       | GCAGACATCCGTACACCACA<br>GGGATCCACTAGTTCTAGACCATGGCATGGAGCATATTATCACCTCGTTTCCTAC<br>CAGATTAATAAAAAATTATAAGCATGCAACGCCTTAATAAACTGAAAGAGCCTGG<br>GGTAAAGGTGAAAAAGGAAGCTCT                                                                                                    | SOE PCR for<br><i>lacR2::spec</i>                                                                             |
| lacR2_F0<br>lacR2_R0<br>lacR2_Fseq<br>lacR2_Rseq                                                           | ACGACTTGGATGACTGGAGAAAAG<br>CTAGGTCGCTATTCAGCTGAAAC<br>CTGAGTTTCCGCTACTTTCTTG<br>AGCTGAATCTGGGAAAAGTGGA                                                                                                                                                                   | <i>lacR2::spec</i> strain<br>sequence<br>verification                                                         |
| SP1773_F<br>SP1773_Rmid<br>lacR2comp_F<br>lacR2comp_R<br>SP1773_Fmid<br>SP1773_Rmid                        | ACACCAAGTTGCCCAGAAG<br>GACCATGCTTATTTTAAACTAAGCAAC<br>GTTGCTTAGTTTAAAATAAGCATGGTCTACTCTTCGAAAATCAAATTCAAACCAC<br>G<br>ACGGTAAGCCAACGCGTCCCCCAATTTCTCAAAAAAGTTAAATCTTATATTTA<br>GTA<br>GGTATCGACCATGGCCCCTGAAAGAATAATTATGCATAAAAAATAGGAATATAAA<br>C<br>GCCAGAAAAAACAGCAGCA | SOE PCR for<br><i>lacR2</i><br>complementation <i>in</i><br><i>trans</i> into the<br>natural locus<br>SP_1773 |
| SP1773_F0<br>SP1773_R0                                                                                     | ACACCAAGTTGCCCAGAAG<br>ACCGAATCTACACCTTCACCTG                                                                                                                                                                                                                             | <i>lacR2</i><br>complementation <i>in</i><br><i>trans</i> resolved<br>strain sequence<br>verification         |
| galR_F1<br>galR_R1spec<br>galR_F2spec<br>galR_R2                                                           | CACCACAACGTGACCATCT<br>GGGATCCACTAGTTCTAGACCATGGCATGAGCCATAAAATCCTCCTTGAT<br>CAGATTAATAAAAAATTATAAGCATGCAACGCAAGAATAGGATAACATAAAAAAC<br>GAA<br>GTGTTGGAGGTAAGAAGTAGGCAG                                                                                                   | SOE PCR for<br><i>galR::spec</i>                                                                              |
| galR_F0<br>galR_R0<br>galR_LFseq<br>galR_L2Fseq<br>galR_L3Fseq<br>galR_R3Rseq<br>galR_R2Rseq<br>galR_RRseq | CGTCGAGTTTTCCTGCCT<br>TCGGCGGGTCTCTTTTGT<br>GCTCAAACCAGCAAATCGGA<br>ACACCTTCTCCCACTCGT<br>GCCCCATAACCAATAGCAAAC<br>GTTTCGTGCGTGCGTTTGT<br>ACCTAGAACTCACCAAACCCA<br>GCTGTTTGGGTGGCTTTTTTCT                                                                                 | <i>galR::spec</i> strain<br>sequence<br>verification                                                          |
| PlacAmut_F<br>PlacAmut_Rmid<br>PlacAmut_Fmid<br>PlacAmut_R                                                 | CGACACGTGGTTATGCAAG<br>CTTTTGTGTTTACATATTTATTTTTACTTTTTATAAACTTCTATCTCAAAC<br>CC<br>GTTTTATAAAAAAGTAAAAAATAAATATGTAAAACAAACAAAAGCTGTTGACTT<br>CT<br>CTTCAACTGATCCTGCCCA                                                                                                   | SOE PCR for<br>LacR-2 operator<br>mutant in tagatose-<br>6-phosphate operon<br>promoter region                |
| PlacAmut_F0<br>PlacAleft_Fseq<br>PlacAright_Rseq<br>PlacAmut_R0                                            | GCGTGGGGACTTTGTGACT<br>ATCCCAGCAATGAGCGTT<br>CCAAATCCTCAGAACTTCTCT<br>CTTACACGCGTTCTTTCCATGA                                                                                                                                                                              | LacR-2 operator<br>mutant (PlacA*)<br>strain sequence<br>verification                                         |
| mphR-<br>kanTER_F<br>kanUP_R                                                                               | CGCAGGCTATTCTGGTGGCCGGAAGGCGAAGCGGCATGCATTTACGTTGATTAG<br>AAGAACTCGTCAAGAAGGCG<br>CGCAAGGGCTGCTAAAGGA                                                                                                                                                                     | SOE PCR for all <i>E.</i><br><i>coli lacZ</i> promoter<br>fusion strains                                      |
| kan-P0645_F                                                                                                | TCCTTTAGCAGCCCTTGCGTAAACAAAATAAAAAATATAAAAAAAGAGACAAAA<br>AAGAAC                                                                                                                                                                                                          | SOE PCR for<br><i>P<sub>SP 0645</sub> - lacZ E.</i>                                                           |

|                                                            |                                                                                                                                          |                                                                            |
|------------------------------------------------------------|------------------------------------------------------------------------------------------------------------------------------------------|----------------------------------------------------------------------------|
| lacZ-P0645_R                                               | CAGTCACGACGTTGTAAAACGACGGCCAGTGAATCCGTAATCATGGTCATAAGT<br>TTTTCCCTTCTTTCCATTAACCTTTATG                                                   | <i>coli</i> promoter fusion strain                                         |
| kan-PlacR2_F<br>lacZ-PlacR2_R                              | TTTAGCAGCCCTTGCCTAACCTCGATATTTTTGTTTTTTGTTT<br>CAGTCACGACGTTGTAAAACGACGGCCAGTGAATCCGTAATCATGGTCATCATA<br>TTATCACCTCGTTTCTAC              | SOE PCR for <i>P<sub>lacR-2</sub>-lacZ E. coli</i> promoter fusion strain  |
| kan-P0916_F<br>lacZ-P0916_R                                | TCCTTTAGCAGCCCTTGCCTCTGTGCCTTTCTTGTGTTTGT<br>CAGTCACGACGTTGTAAAACGACGGCCAGTGAATCCGTAATCATGGTCATCAAA<br>ACATACTCCTTTCAATATTTTTAGGACC      | SOE PCR for <i>P<sub>SP0916</sub>-lacZ E. coli</i> promoter fusion strain  |
| kan-P1199_F<br>lacZ-P1199_R                                | TCCTTTAGCAGCCCTTGCCTAACCTCGATATTTTTGTTTTTTGTTT<br>CAGTCACGACGTTGTAAAACGACGGCCAGTGAATCCGTAATCATGGTCATGCTT<br>GCTACCTGATCAAAAAGTTATTC      | SOE PCR for <i>P<sub>SP 1199</sub>-lacZ E. coli</i> promoter fusion strain |
| kan-PlacA_F<br>lacZ-PlacA_R                                | TCCTTTAGCAGCCCTTGCCTAACCTCGATATTTTTGTTTTTTGTTT<br>CAGTCACGACGTTGTAAAACGACGGCCAGTGAATCCGTAATCATGGTCATGCTT<br>GCTACCTGATCAAAAAGTTATTC      | SOE PCR for <i>PlacZ-lacZ E. coli</i> promoter fusion strain               |
| kan-PlacAopdel_F<br>lacZ-PlacAopdel_R                      | CTTCCTTTAGCAGCCCTTGCCTAACCTCGATATTTTTGTTTTTTGTTT<br>CAGTCACGACGTTGTAAAACGACGGCCAGTGAATCCGTAATCATGGTCATATTG<br>TATACTCCTTTTTATTTTTTCTATGC | SOE PCR for <i>PlacZ-lacZ E. coli</i> promoter fusion strain               |
| mhpR_F<br>lacZ_R<br>lacZprom_Fs<br>eq<br>lacZprom_Rs<br>eq | CGCAGGCTATTCTGGTGG<br>AGTCACGACGTTGTAAAACGAC<br>GAACAGGCAGCGGAAAAGCA<br>AGCTGGCGAAAGGGGGATGT                                             | Sequence verification for all <i>E. coli lacZ</i> promoter fusion strains  |
| 5'SmaI-lacR2_F<br>3'EcoRI-lacR2_R                          | CCTGGTCCCAGGAAACGAGGTGATAATATGCTCAAACAAG<br>GTGCTCGAATTCTTAAGGCTGATGACTTTAATGTGTTTAGATAGC                                                | For cloning <i>lacR2</i> and promoter region into pDL993                   |
| rpli_FqRT<br>rpli_RqRT                                     | CGACCATCTGGACCAACTTT<br>CTAGCCAAAGAAGCGACTGC                                                                                             | For qRT-PCR of housekeeping gene <i>rpli</i> (SP_2204)                     |
| bgaA_FqRT<br>bgaA_RqRT                                     | CAACCCACAACCCTGCTAGT<br>TTTCGAGCTTCTGGGTGAGT                                                                                             | For qRT-PCR of <i>bgaA</i>                                                 |
| lacA_FqRT<br>lacA_RqRT                                     | CAGATGCTGCAGGTTTGTAGA<br>GCAGCAACCATTCTTTGAT                                                                                             | For qRT-PCR of <i>lacA</i>                                                 |
| lacC_FqRT<br>lacC_RqRT                                     | TGGCAAGCATGTAGTCTTGG<br>CAATCCCTGCAAACAAAGGT                                                                                             | For qRT-PCR of <i>lacC</i>                                                 |
| bgaC_FqRT<br>bgaC_RqRT                                     | TGTCGATGGTCAGTGGGTTA<br>TTCCCTTACGTTGCGTATCC                                                                                             | For qRT-PCR of <i>bgaC</i>                                                 |
| galK_FqRT<br>galK_RqRT                                     | TCTCGGTGCTCGTATGACAG<br>CACCTGCAACTTCAGCGATA                                                                                             | For qRT-PCR of <i>galK</i>                                                 |
| galR_FqRT<br>galR_RqRT                                     | CTGAAGAGCTGGGCTACACC<br>CCCAATCACTTCCTCGCTTA                                                                                             | For qRT-PCR of <i>galR</i>                                                 |
| SP1199_FqRT<br>T<br>SP1199_RqRT<br>T                       | TTGGAAGAACGAGAAATTGTCA<br>CATTTGCAAGTCCTTTCTAGA                                                                                          | For qRT-PCR of SP_1199                                                     |
| lacR2_FqRT<br>lacR2_RqRT                                   | TTCGAACCAACTCCCTTTTG<br>TTACGACGCGGATATTGTCA                                                                                             | For qRT-PCR of <i>lacR-2</i>                                               |
